# Supplementary material for: Z-scheme Al2SeTe/GaSe and Al2SeTe/InS van der Waals heterostructures for photocatalytic water splitting
Source: Royal Society of Chemistry journal article supplement (doi:10.1039/d3cp05819k), 2024-01-01
Supplement: d3cp05819k1.pdf [file d3cp05819k1.pdf]

Supporting Information for

**Z-scheme Al<sub>2</sub>SeTe/GaSe and Al<sub>2</sub>SeTe/InS van der Waals heterostructures for photocatalytic water splitting**

Shaoying Guo<sup>1,2,\*†</sup>, Zhou Cui<sup>3†</sup>, Yanhui, Zou<sup>1</sup> and Baisheng Sa<sup>3,\*\*</sup>

<sup>1</sup>*School of Pharmacy, Fujian Health College, Fuzhou, Fujian 350101, P. R. China*

<sup>2</sup>*Fujian Provincial Key Laboratory of Pollution Control & Resource Reuse, Fujian Normal University, Fuzhou 350003, P. R. China*

<sup>3</sup>*Multiscale Multiscale Computational Materials Facility & Materials Genome Institute, School of Materials Science and Engineering, Fuzhou University, Fuzhou 350108, P. R. China.*

**Corresponding Authors:** gshy1511@126.com (S. Guo); bssa@fzu.edu.cn (B. Sa).

†These authors contributed equally to this work.

**Table S1** The binding energies ( $E_b$ ) of the heterostructures between different stacking configurations

| Stacking configurations   | 0°<br>(meV/Å <sup>2</sup> ) | 60°<br>(meV/Å <sup>2</sup> ) | 120°<br>(meV/Å <sup>2</sup> ) | 180°<br>(meV/Å <sup>2</sup> ) | 240°<br>(meV/Å <sup>2</sup> ) | 300°<br>(meV/Å <sup>2</sup> ) |
|---------------------------|-----------------------------|------------------------------|-------------------------------|-------------------------------|-------------------------------|-------------------------------|
| Al <sub>2</sub> SeTe/GaSe | -11.74                      | -16.74                       | -16.57                        | -16.65                        | -16.51                        | -11.77                        |
| Al <sub>2</sub> TeSe/GaSe | -10.73                      | -15.76                       | -15.65                        | -15.57                        | -15.71                        | -10.77                        |
| Al <sub>2</sub> SeTe/InS  | -11.40                      | -16.57                       | -16.69                        | -16.60                        | -16.15                        | -11.44                        |
| Al <sub>2</sub> TeSe/InS  | -10.33                      | -15.61                       | -15.80                        | -15.62                        | -15.59                        | -10.36                        |

**Table S2** The formation energies ( $E_f$ ) of the heterostructures between different stacking configurations.

| Stacking configurations   | 0° (eV) | 60° (eV) | 120° (eV) | 180° (eV) | 240° (eV) | 300° (eV) |
|---------------------------|---------|----------|-----------|-----------|-----------|-----------|
| Al <sub>2</sub> SeTe/GaSe | -0.111  | -0.176   | -0.174    | -0.175    | -0.174    | -0.112    |
| Al <sub>2</sub> TeSe/GaSe | -0.098  | -0.164   | -0.162    | -0.161    | -0.163    | -0.099    |
| Al <sub>2</sub> SeTe/InS  | -0.150  | -0.219   | -0.221    | -0.220    | -0.218    | -0.150    |
| Al <sub>2</sub> TeSe/InS  | -0.135  | -0.206   | -0.209    | -0.206    | -0.206    | -0.136    |

**Table S3** The lattice constants, layer distances and band gaps of Al<sub>2</sub>SeTe/GaSe, Al<sub>2</sub>TeSe/ GaSe, Al<sub>2</sub>SeTe/InS and Al<sub>2</sub>TeSe/InS heterostructures

| Heterostructure           | Lattice constant (Å) | Layer distance (Å) | Band gap (eV) |
|---------------------------|----------------------|--------------------|---------------|
| Al <sub>2</sub> SeTe/GaSe | 3.869                | 3.44               | 1.69          |
| Al <sub>2</sub> TeSe/GaSe | 3.871                | 3.26               | 1.77          |
| Al <sub>2</sub> SeTe/InS  | 3.926                | 3.29               | 1.53          |
| Al <sub>2</sub> TeSe/InS  | 3.927                | 3.11               | 1.66          |

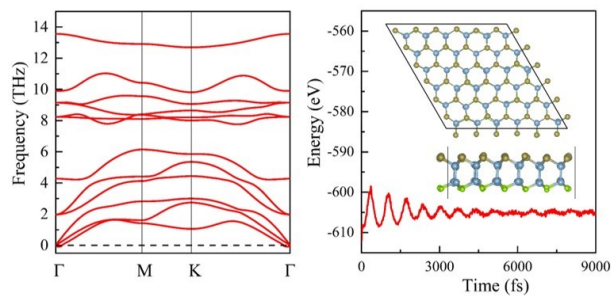

**Fig.S1** The phonon dispersion curves and AIMD simulations of Al<sub>2</sub>SeTe monolayer.

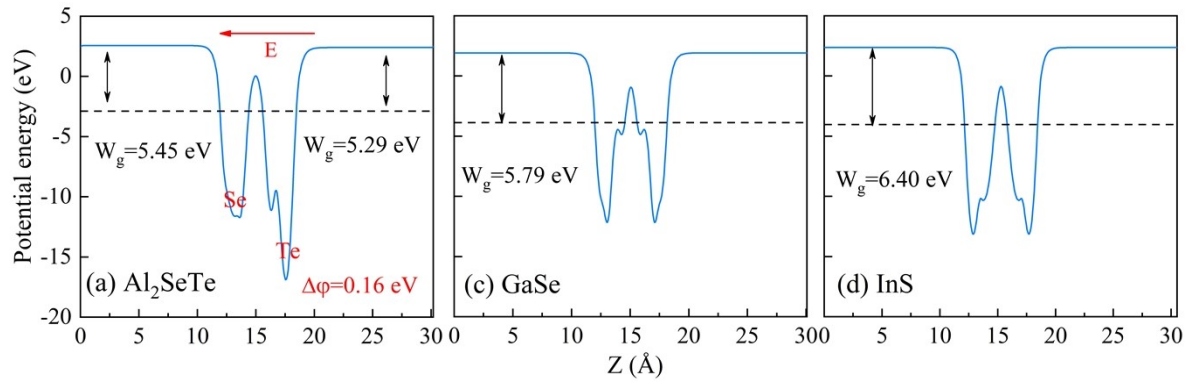

**Fig.S2** The planar-averaged electrostatic potential for (a) Janus  $\text{Al}_2\text{SeTe}$ , (b)  $\text{GaSe}$  and (c)  $\text{InS}$  monolayers along the  $z$ -direction.

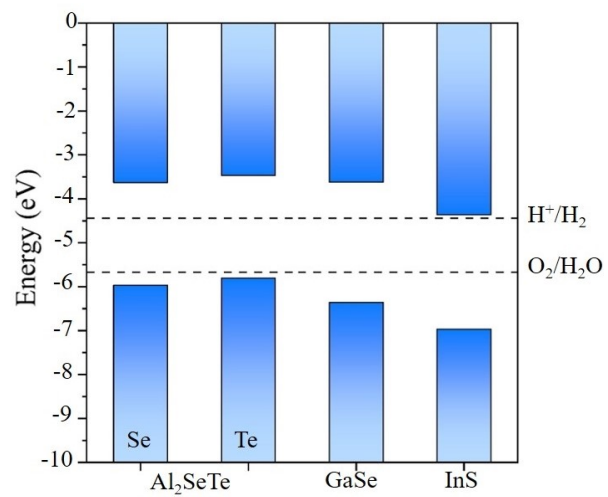

**Fig. S3** The band edge positions of the Janus Al<sub>2</sub>SeTe, GaSe and InS monolayers.

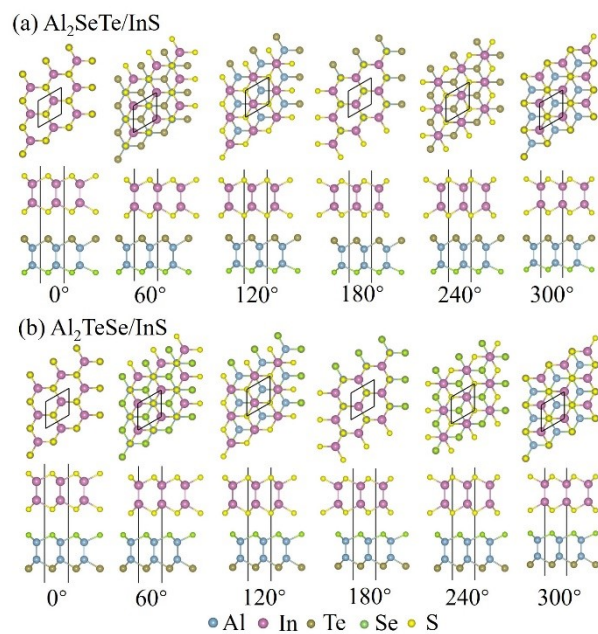

**Fig.S4** Top and side views of (a)  $\text{Al}_2\text{SeTe/InS}$  and (b)  $\text{Al}_2\text{TeSe/InS}$  heterostructures with different stacking configurations.



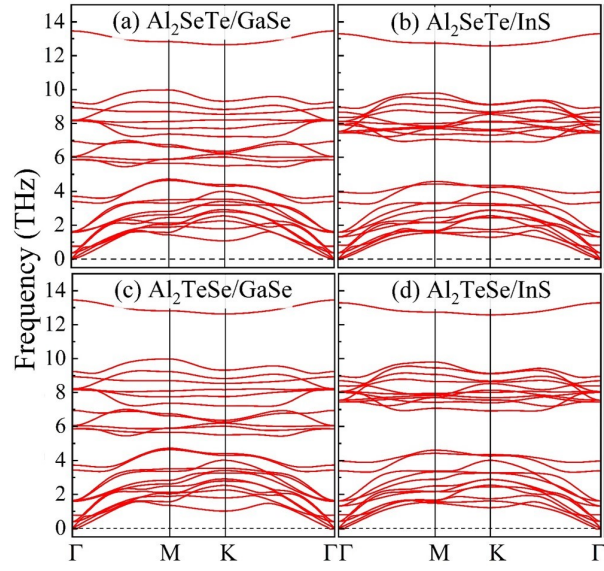

**Fig. S5** The phonon dispersion curves of (a)  $\text{Al}_2\text{SeTe}/\text{GaSe}$ , (b)  $\text{Al}_2\text{SeTe}/\text{InS}$ , (c)  $\text{Al}_2\text{TeSe}/\text{GaSe}$  and (d)  $\text{Al}_2\text{TeSe}/\text{InS}$  heterostructures.

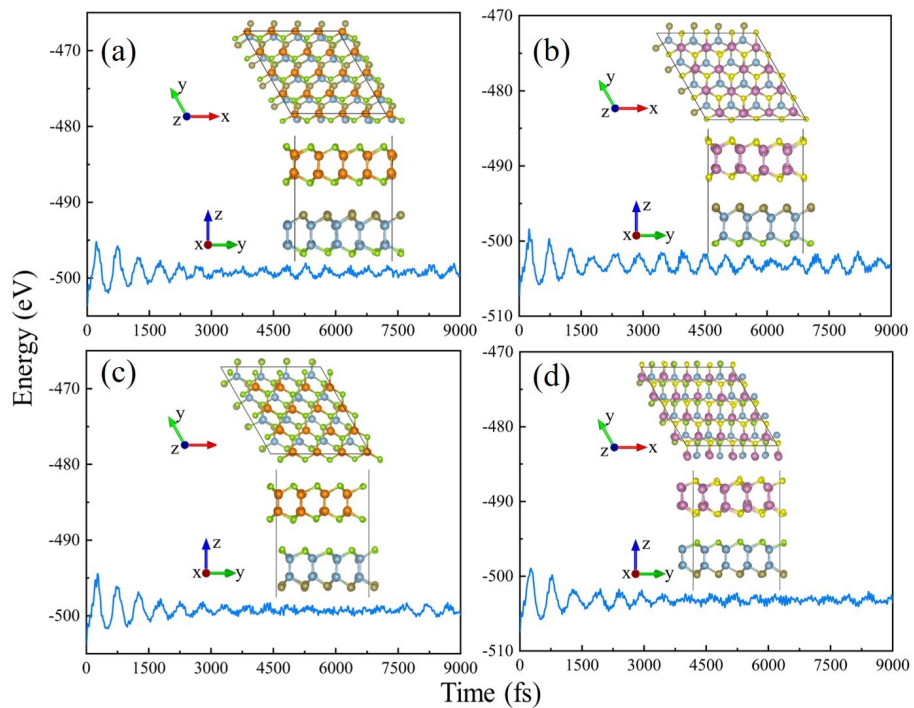

**Fig. S6** The AIMD simulations of (a) Al<sub>2</sub>SeTe/GaSe, (b) Al<sub>2</sub>SeTe/InS, (c) Al<sub>2</sub>TeSe/GaSe and (d) Al<sub>2</sub>TeSe/InS heterostructures with 300 K.

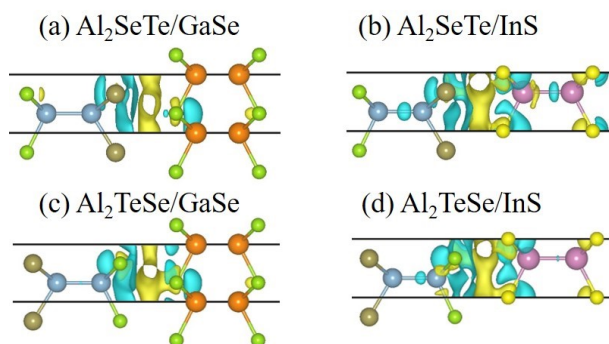

**Fig. S7** The 3D isosurface plots for the charge density difference of (a)  $\text{Al}_2\text{SeTe}/\text{GaSe}$ , (b)  $\text{Al}_2\text{SeTe}/\text{InS}$ , (c)  $\text{Al}_2\text{TeSe}/\text{GaSe}$  and (d)  $\text{Al}_2\text{TeSe}/\text{InS}$  heterostructures. The isovalue is set to  $0.00005 \text{ e} \cdot \text{\AA}^{-3}$ . The blue and yellow regions represent the loss and accumulation of charges.

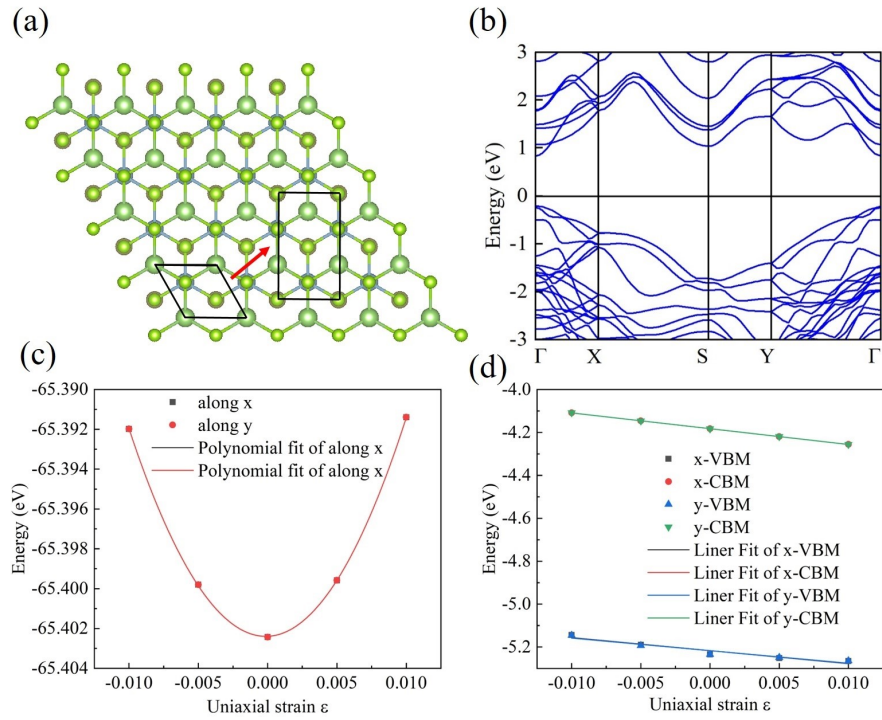

**Fig. S8** The orthorhombic (a) lattice structure, (b) band structure of  $\text{Al}_2\text{SeTe}/\text{GaSe}$  heterostructure, (c) total energy and (d) band edge positions of  $\text{Al}_2\text{SeTe}/\text{GaSe}$  as a function of the uniaxial strain  $\epsilon$  along both the zigzag (x) and armchair (y) directions.

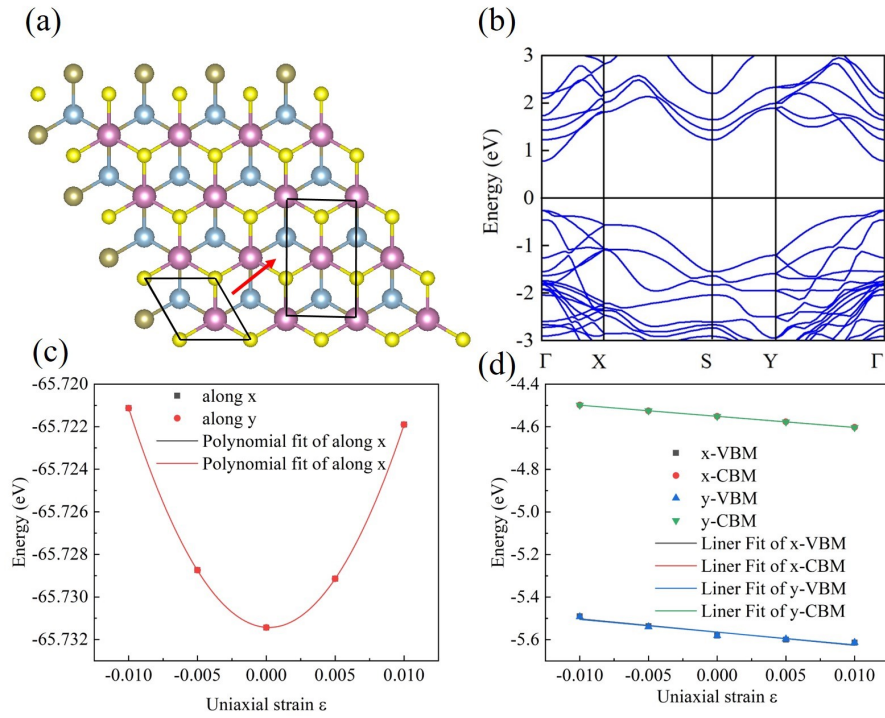

**Fig. S9** The orthorhombic (a) lattice structure, (b) band structure of  $\text{Al}_2\text{SeTe}/\text{InS}$  heterostructure, (c) total energy and (d) band edge positions of  $\text{Al}_2\text{SeTe}/\text{InS}$  as a function of the uniaxial strain  $\epsilon$  along both the zigzag (x) and armchair (y) directions.

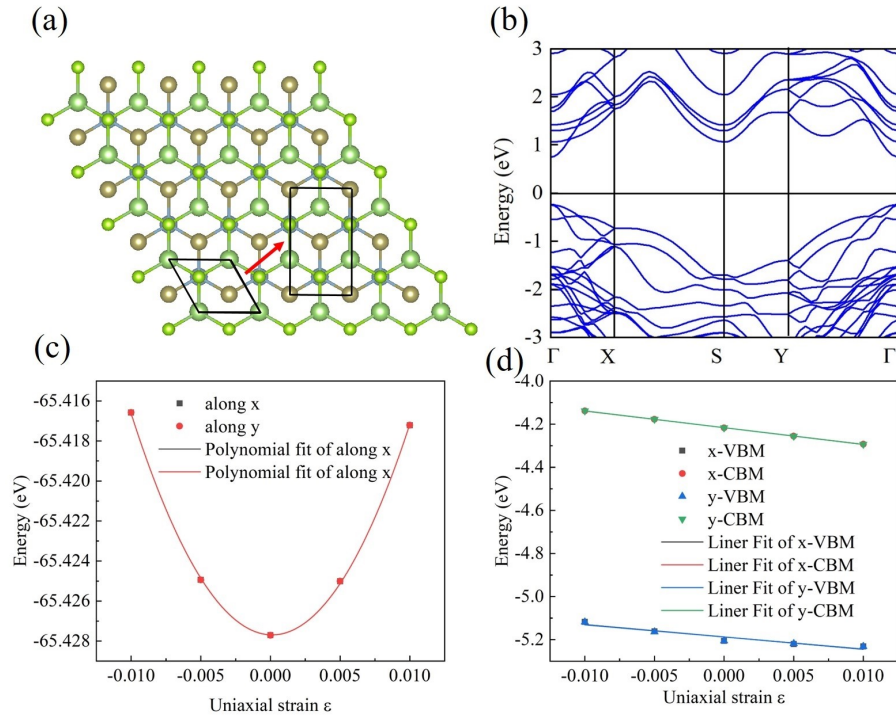

**Fig. S10** The orthorhombic (a) lattice structure, (b) band structure of Al<sub>2</sub>TeSe/GaSe heterostructure, (c) total energy and (d) band edge positions of Al<sub>2</sub>TeSe/GaSe as a function of the uniaxial strain  $\epsilon$  along both the zigzag (x) and armchair (y) directions.

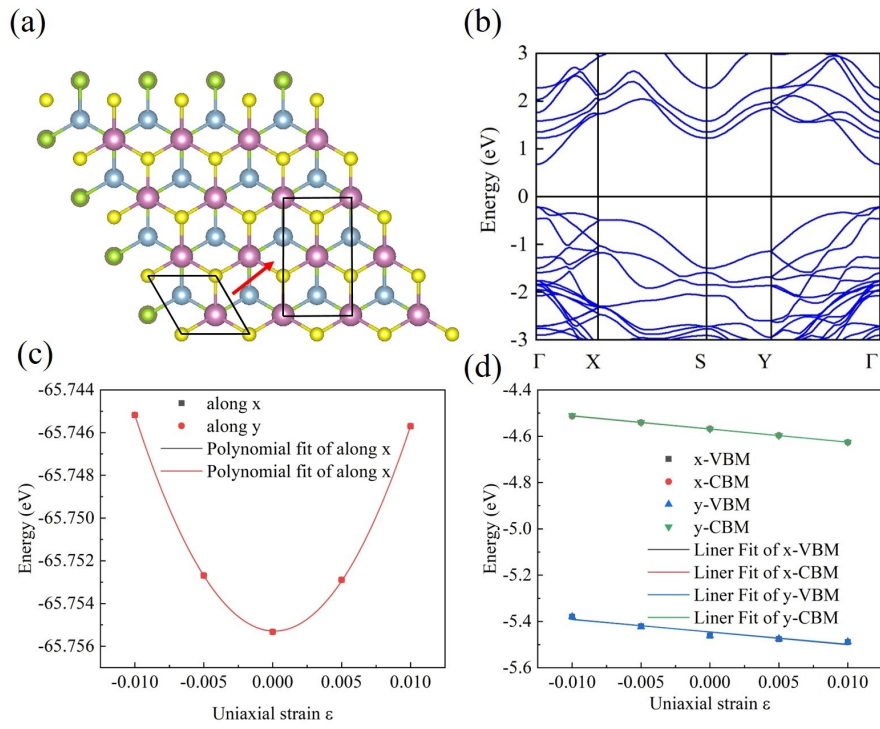

**Fig. S11** The orthorhombic (a) lattice structure, (b) band structure of Al<sub>2</sub>TeSe/InS heterostructure, (c) total energy and (d) band edge positions of Al<sub>2</sub>TeSe/InS as a function of the uniaxial strain  $\epsilon$  along both the zigzag (x) and armchair (y) directions.
